# Supplementary material
Source: MDPI journal article supplement (https://www.mdpi.com/1999-4907/14/5/1011)
Supplement: s1 [file s1]

## Quality of the pellets obtained with wood and cutting residues of stone pine (*Pinus pinea* L.)

Manuel Fernández, Raúl Tapias, Victoriano Camacho, Joaquín Alaejos

### Supplementary Material

**Table S1.** Specification of wood pellet classes for commercial and residential uses (ISO 17225-2) [49].

| Property                                   | Standard                   | A1                                                                                  | A2                                                                                                                                     | B                                                                                                                                       |
|--------------------------------------------|----------------------------|-------------------------------------------------------------------------------------|----------------------------------------------------------------------------------------------------------------------------------------|-----------------------------------------------------------------------------------------------------------------------------------------|
| Origin and source                          | ISO 17225-1                | 1.1.3 Stem wood<br>1.2.1 Residues /<br>remains of wood<br>not chemically<br>treated | 1.1.1 Whole trees<br>1.1.3 Stem wood<br>1.1.4 Logging<br>residues<br>1.2.1. Residues /<br>remains of wood<br>not chemically<br>treated | 1.1 Forest<br>plantation and<br>other virgin<br>wood<br>1.2 By-products<br>and residues<br>1.3.1 Used wood<br>not chemically<br>treated |
| Diameter and length,<br>D and L (mm)       | ISO 17829                  | D06, 6 ± 1;<br>3.15 ≤ L ≤ 40                                                        | D06, 6 ± 1;<br>3.15 ≤ L ≤ 40                                                                                                           | D06, 6 ± 1;<br>3.15 < L < 40                                                                                                            |
| Moisture, M (w-%)                          | ISO 18134-1<br>ISO 18134-2 | M10 ≤ 10                                                                            | M10 ≤ 10                                                                                                                               | M10 ≤ 10                                                                                                                                |
| Ash, A (w-%)                               | ISO 18122                  | A0.7 ≤ 0.7                                                                          | A1.2 ≤ 1.2                                                                                                                             | A2.0 ≤ 2.0                                                                                                                              |
| Durability, DU (w-%)                       | ISO 1783-1                 | DU98.0 ≥ 98.0                                                                       | DU97.5 ≥ 97.5                                                                                                                          | DU96.5 ≥ 96.5                                                                                                                           |
| Fines, F (w-%)                             | EN 15210-1                 | F1.0 ≤ 1.0                                                                          | F1.0 ≤ 1.0                                                                                                                             | F1.0 ≤ 1.0                                                                                                                              |
| Net calorific value, Q<br>(MJ/ kg, kWh/kg) | ISO 18125                  | Q ≥ 16.5<br>Q ≥ 4.6                                                                 | Q ≥ 16.5<br>Q ≥ 4.6                                                                                                                    | Q ≥ 16.5<br>Q ≥ 4.6                                                                                                                     |
| Bulk density, BD<br>(kg/m <sup>3</sup> )   | ISO 17828                  | 600 ≤ BD ≤ 750                                                                      | 600 ≤ BD ≤ 750                                                                                                                         | 600 ≤ BD ≤ 750                                                                                                                          |
| Nitrogen, N (w-%)                          | ISO 16948                  | N0.3 ≤ 0.3                                                                          | N0.3 ≤ 0.3                                                                                                                             | N0.3 ≤ 0.3                                                                                                                              |
| Sulfur, S (w-%)                            | ISO 16994                  | S0.04 ≤ 0.04                                                                        | S0.04 ≤ 0.04                                                                                                                           | S0.05 ≤ 0.05                                                                                                                            |
| Chlorine, Cl (w-%)                         | ISO 16994                  | Cl0.02 ≤ 0.02                                                                       | Cl0.02 ≤ 0.02                                                                                                                          | Cl0.03 ≤ 0.03                                                                                                                           |

Only the values of the properties studied in the article are included

Reference is only made to pellets with a diameter of 6 mm and not to those of 8 mm.

**Table S2.** Specification of the classes of wood pellets for industrial use. (ISO 17225-2) [49]

| Property                               | Standard                   | I1                                                                                                      | I2                                                                                                      | I3                                                                                                                    |
|----------------------------------------|----------------------------|---------------------------------------------------------------------------------------------------------|---------------------------------------------------------------------------------------------------------|-----------------------------------------------------------------------------------------------------------------------|
| Origin and source                      | ISO 17225-1                | 1.1 Forest plantation and other virgin wood<br>1.2.1. Residues / remains of wood not chemically treated | 1.1 Forest plantation and other virgin wood<br>1.2.1. Residues / remains of wood not chemically treated | 1.1 Forest plantation and other virgin wood<br>1.2 By-products and residues<br>1.3.1 Used wood not chemically treated |
| Diameter and length, D and L, (mm)     | ISO 17829                  | D06, 6 ± 1;<br>3.15 ≤ L ≤ 40                                                                            | D06, 6 ± 1;<br>3.15 ≤ L ≤ 40                                                                            | D06, 6 ± 1;<br>3.15 < L < 40                                                                                          |
| Moisture, M, (w-%)                     | ISO 18134-1<br>ISO 18134-2 | M10 ≤ 10                                                                                                | M10 ≤ 10                                                                                                | M10 ≤ 10                                                                                                              |
| Ash, A, (w-%)                          | ISO 18122                  | A1.0 ≤ 1.0                                                                                              | A1.5 ≤ 1.5                                                                                              | A3.0 ≤ 2.0                                                                                                            |
| Durability (DU, w-%)                   | ISO 1783-1                 | 97.5 ≤ DU ≤ 99.0                                                                                        | 97.0 ≤ DU ≤ 99.0                                                                                        | 96.5 ≤ DU ≤ 99.0                                                                                                      |
| Fines (F, w-%)                         | EN 15210-1                 | F4.0 ≤ 4.0                                                                                              | F5.0 ≤ 5.0                                                                                              | F6.0 ≤ 6.0                                                                                                            |
| Net calorific value, Q, (MJ/ kg)       | ISO 18125                  | Q16.5 ≥ 16.5                                                                                            | Q16.5 ≥ 16.5                                                                                            | Q16.5 ≥ 16.5                                                                                                          |
| Bulk density, BD, (kg/m <sup>3</sup> ) | ISO 17828                  | BD600 ≥ 600                                                                                             | BD600 ≥ 600                                                                                             | BD600 ≥ 600                                                                                                           |

Only the values of the properties studied in the article are included

Reference is only made to pellets with a diameter of 6 mm and not to those of 8 mm.

**Table S3.** Granulometric distribution of the sawdust used in the tests for each type of biomass and sieve.

| Particle size (mm) | NTW (5 mm) | BARK (5 mm) | MBR (5 mm) | DTTB (5 mm) | DTTB (3,5 mm) | DTTB (2 mm) |
|--------------------|------------|-------------|------------|-------------|---------------|-------------|
| >3.15              | 4.25       | 8.53        | 18.93      | 16.65       | 5.35          | 0.30        |
| 2.8-3.15           | 14.72      | 13.67       | 15.61      | 18.24       | 16.58         | 3.52        |
| 2.0-2.8            | 16.47      | 17.98       | 18.95      | 13.56       | 12.27         | 6.29        |
| 1.4-2.0            | 19.68      | 18.34       | 14.96      | 14.55       | 14.50         | 23.05       |
| 0.1-1.4            | 15.10      | 14.11       | 10.75      | 14.01       | 17.22         | 21.34       |
| 0.5-1.0            | 15.78      | 12.35       | 11.65      | 12.49       | 16.50         | 19.50       |
| 0.25-0.5           | 10.09      | 10.70       | 6.51       | 7.61        | 13.03         | 17.41       |
| <0.25              | 3.91       | 4.32        | 2.64       | 2.89        | 4.55          | 8.59        |

**Table S4.** Pellets properties (mean  $\pm$   $\sigma$ ) with different dies and types of stone pine biomass

|        | Yield (%)      | Pellet moisture (%) | Durability (%)   | Bulk density (kg/m <sup>3</sup> ) | Pellet length (cm) | Particle density (kg/m <sup>3</sup> ) |
|--------|----------------|---------------------|------------------|-----------------------------------|--------------------|---------------------------------------|
| 18NTW  | 62.8 $\pm$ 0.1 | 11.34 $\pm$ 0.01    | 64.3 $\pm$ 3.6   | 496.4 $\pm$ 2.6                   | 1.09 $\pm$ 0.01    | 1064.6 $\pm$ 8.8                      |
| 18BARK | 80.3 $\pm$ 0.1 | 9.73 $\pm$ 0.06     | 63.3 $\pm$ 0.7   | 574.6 $\pm$ 5.2                   | 0.99 $\pm$ 0.03    | 1084.0 $\pm$ 15.6                     |
| 18MBR  | 98.9 $\pm$ 0.1 | 7.98 $\pm$ 0.16     | 93.6 $\pm$ 0.6   | 638.2 $\pm$ 7.7                   | 1.79 $\pm$ 0.04    | 1217.5 $\pm$ 1.3                      |
| 18DTTB | 99.4 $\pm$ 0.1 | 4.49 $\pm$ 0.08     | 93.9 $\pm$ 0.7   | 669.6 $\pm$ 3.7                   | 1.77 $\pm$ 0.10    | 1293.2 $\pm$ 24.4                     |
| 20NTW  | 66.3 $\pm$ 0.1 | 11.44 $\pm$ 0.02    | 65.3 $\pm$ 0.6   | 495.5 $\pm$ 1.3                   | 1.00 $\pm$ 0.02    | 1118.5 $\pm$ 10.1                     |
| 20BARK | 86.8 $\pm$ 0.1 | 11.46 $\pm$ 0.08    | 62.8 $\pm$ 1.1   | 569.1 $\pm$ 1.0                   | 0.86 $\pm$ 0.04    | 1187.7 $\pm$ 38.5                     |
| 20MBR  | 98.6 $\pm$ 1.4 | 8.43 $\pm$ 0.02     | 89.4 $\pm$ 1.3   | 638.2 $\pm$ 2.6                   | 1.55 $\pm$ 0.03    | 1224.5 $\pm$ 23.0                     |
| 20DTTB | 99.5 $\pm$ 0.3 | 5.89 $\pm$ 0.97     | 95.2 $\pm$ 2.0   | 671.4 $\pm$ 3.1                   | 1.75 $\pm$ 0.10    | 1280.2 $\pm$ 25.8                     |
| 22NTW  | 72.0 $\pm$ 0.1 | 10.10 $\pm$ 0.01    | 66.66 $\pm$ 2.38 | 514.55 $\pm$ 5.16                 | 0.97 $\pm$ 0.00    | 1066.1 $\pm$ 2.5                      |
| 22BARK | 94.8 $\pm$ 0.1 | 10.46 $\pm$ 0.69    | 72.64 $\pm$ 0.76 | 587.30 $\pm$ 2.55                 | 0.76 $\pm$ 0.00    | 1094.4 $\pm$ 1.4                      |
| 22MBR  | 99.3 $\pm$ 0.1 | 7.55 $\pm$ 0.01     | 94.28 $\pm$ 0.47 | 668.20 $\pm$ 1.27                 | 1.79 $\pm$ 0.00    | 1246.5 $\pm$ 10.0                     |
| 22DTTB | 99.4 $\pm$ 0.2 | 7.20 $\pm$ 1.43     | 94.97 $\pm$ 1.06 | 639.10 $\pm$ 31.76                | 1.74 $\pm$ 0.16    | 1220.4 $\pm$ 27.0                     |
| 24NTW  | 91.8 $\pm$ 0.1 | 8.75 $\pm$ 0.03     | 77.5 $\pm$ 1.9   | 574.6 $\pm$ 10.3                  | 1.28 $\pm$ 0.05    | 1197.1 $\pm$ 80.0                     |
| 24BARK | 94.3 $\pm$ 0.2 | 8.91 $\pm$ 0.03     | 73.7 $\pm$ 1.3   | 651.0 $\pm$ 7.7                   | 0.91 $\pm$ 0.03    | 1248.8 $\pm$ 1.4                      |
| 24MBR  | 97.5 $\pm$ 0.1 | 4.35 $\pm$ 0.02     | 88.3 $\pm$ 0.3   | 696.4 $\pm$ 2.6                   | 1.29 $\pm$ 0.01    | 1303.8 $\pm$ 1.8                      |
| 24DTTB | 99,6 $\pm$ 0,1 | 4,86 $\pm$ 0,82     | 92,5 $\pm$ 2,2   | 723,2 $\pm$ 3,5                   | 1,38 $\pm$ 0,03    | 1320,1 $\pm$ 25,4                     |

**Table S5.** Pearson correlation coefficients among the characteristics of the pellet samples of pine residues. The significant correlation values (<0.05) are depicted in bold.

| Correlation Coefficients |                  | Yield        | Moisture     | Durability   | Bulk density | Pellet length | Particle density |
|--------------------------|------------------|--------------|--------------|--------------|--------------|---------------|------------------|
| Pearson Correlation      | Yield            | 1.000        | 0.314        | 0.786        | -0.145       | 0.361         | -0.085           |
|                          | Moisture         | 0.314        | 1.000        | 0.519        | -0.925       | 0.745         | -0.615           |
|                          | Durability       | 0.786        | 0.519        | 1.000        | -0.300       | 0.554         | -0.337           |
|                          | Bulk density     | -0.145       | -0.925       | -0.300       | 1.000        | -0.642        | 0.638            |
|                          | Pellet length    | 0.361        | 0.745        | 0.554        | -0.642       | 1.000         | -0.460           |
|                          | Particle density | -0.085       | -0.615       | -0.337       | 0.638        | -0.460        | 1.000            |
| Signification            | Yield            | -            | <b>0.003</b> | <b>0.000</b> | 0.179        | <b>0.001</b>  | 0.430            |
|                          | Moisture         | <b>0.003</b> | -            | <b>0.000</b> | <b>0.000</b> | <b>0.000</b>  | <b>0.000</b>     |
|                          | Durability       | <b>0.000</b> | <b>0.000</b> | -            | <b>0.004</b> | <b>0.000</b>  | <b>0.001</b>     |
|                          | Bulk density     | 0.179        | <b>0.000</b> | <b>0.004</b> | -            | <b>0.000</b>  | <b>0.000</b>     |
|                          | Pellet length    | <b>0.001</b> | <b>0.000</b> | <b>0.000</b> | <b>0.000</b> | -             | <b>0.000</b>     |
|                          | Particle density | 0.430        | <b>0.000</b> | <b>0.001</b> | <b>0.000</b> | <b>0.000</b>  | -                |

**Table S6.** Properties of stone pine wood pellets with different dies (18, 20, 22 and 24), moisture content (MOI, 1 = 11.5%, 2 = 14%, 3 = 16.5%) and particle sizes.

|           | Yield (%)   | Pellet moisture (%) | Durability (%) | Bulk density (kg/m <sup>3</sup> ) | Pellet length (cm) | Particle density (kg/m <sup>3</sup> ) |
|-----------|-------------|---------------------|----------------|-----------------------------------|--------------------|---------------------------------------|
| 18MOI1-SF | 99.4 ± 0.1  | 4.49 ± 0.13         | 93.5 ± 0.2     | 671.8 ± 3.8                       | 1.68 ± 0.05        | 1295.7 ± 39.1                         |
| 18MOI1-SM | 99.2 ± 0.2  | 6.49 ± 0.15         | 91.7 ± 1.2     | 639.1 ± 16.7                      | 1.83 ± 0.03        | 1254.5 ± 14.4                         |
| 18MOI1-SC | 99.8 ± 0.1  | 7.19 ± 0.04         | 96.3 ± 0.1     | 623.7 ± 10.3                      | 2.13 ± 0.01        | 1271.0 ± 21.9                         |
| 18MOI2-SF | 99.4 ± 0.1  | 4.50 ± 0.01         | 94.4 ± 0.6     | 667.3 ± 2.6                       | 1.86 ± 0.01        | 1290.7 ± 15.4                         |
| 18MOI2-SM | 99.4 ± 0.2  | 6.96 ± 1.10         | 93.2 ± 1.7     | 622.7 ± 52.9                      | 1.77 ± 0.16        | 1291.3 ± 52.8                         |
| 18MOI2-SC | 99.8 ± 0.1  | 9.06 ± 0.53         | 96.8 ± 0.0     | 604.6 ± 6.4                       | 2.24 ± 0.02        | 1246.5 ± 5.9                          |
| 18MOI3-SF | 99.6 ± 0.1  | 4.51 ± 0.04         | 94.1 ± 0.1     | 678.2 ± 12.9                      | 1.86 ± 0.04        | 1307.9 ± 10.0                         |
| 18MOI3-SM | 99.0 ± 0.3  | 4.26 ± 0.07         | 90.7 ± 1.4     | 680.9 ± 1.3                       | 1.72 ± 0.03        | 1300.2 ± 16.2                         |
| 18MOI3-SC | 99.6 ± 0.2  | 11.68 ± 0.25        | 93.1 ± 1.1     | 512.7 ± 2.6                       | 1.84 ± 0.01        | 1169.1 ± 35.9                         |
| 20MOI1-SF | 99.3 ± 0.2  | 5.06 ± 0.04         | 93.5 ± 0.5     | 672.7 ± 2.6                       | 1.66 ± 0.01        | 1285.2 ± 35.1                         |
| 20MOI1-SM | 99.6 ± 0.1  | 6.14 ± 0.06         | 95.6 ± 0.4     | 660.0 ± 10.3                      | 1.72 ± 0.03        | 1259.9 ± 7.9                          |
| 20MOI1-SC | 199.8 ± 0.3 | 6.35 ± 0.05         | 97.2 ± 0.1     | 664.6 ± 11.5                      | 2.03 ± 0.01        | 1272.0 ± 3.1                          |
| 20MOI2-SF | 99.8 ± 0.1  | 6.73 ± 0.18         | 96.9 ± 0.4     | 670.0 ± 3.8                       | 1.84 ± 0.05        | 1275.2 ± 25.7                         |
| 20MOI2-SM | 99.6 ± 0.2  | 6.66 ± 1.34         | 95.4 ± 1.1     | 663.3 ± 24.1                      | 1.83 ± 0.09        | 1272.1 ± 12.1                         |
| 20MOI2-SC | 99.9 ± 0.1  | 8.70 ± 0.05         | 98.1 ± 0.1     | 630.0 ± 1.3                       | 2.10 ± 0.02        | 1235.7 ± 26.0                         |
| 20MOI3-SF | 99.9 ± 0.1  | 7.97 ± 0.02         | 98.5 ± 0.1     | 648.2 ± 3.8                       | 2.16 ± 0.02        | 1254.9 ± 3.9                          |
| 20MOI3-SM | 99.8 ± 0.1  | 6.27 ± 0.01         | 95.9 ± 0.1     | 680.0 ± 5.1                       | 1.83 ± 0.04        | 1290.8 ± 2.0                          |
| 20MOI3-SC | 99.8 ± 0.1  | 10.07 ± 0.24        | 97.6 ± 0.1     | 585.5 ± 10.3                      | 2.00 ± 0.01        | 1249.3 ± 49.8                         |
| 22MOI1-SF | 99.3 ± 0.2  | 6.00 ± 0.54         | 94.1 ± 0.5     | 666.4 ± 3.9                       | 1.60 ± 0.01        | 1232.6 ± 14.2                         |
| 22MOI1-SM | 99.7 ± 0.1  | 6.36 ± 0.08         | 95.9 ± 0.2     | 648.2 ± 9.0                       | 1.91 ± 0.03        | 1233.3 ± 15.0                         |
| 22MOI1-SC | 99.7 ± 0.1  | 6.19 ± 0.03         | 96.2 ± 0.1     | 661.9 ± 5.2                       | 1.76 ± 0.04        | 1245.4 ± 27.1                         |
| 22MOI2-SF | 99.5 ± 0.2  | 8.41 ± 0.11         | 95.8 ± 0.6     | 611.9 ± 6.4                       | 1.88 ± 0.02        | 1208.2 ± 37.2                         |
| 22MOI2-SM | 99.5 ± 0.3  | 7.73 ± 0.97         | 96.5 ± 1.1     | 637.6 ± 17.6                      | 1.95 ± 0.24        | 1232.6 ± 25.5                         |
| 22MOI2-SC | 99.7 ± 0.1  | 7.50 ± 0.51         | 96.0 ± 0.3     | 601.0 ± 6.4                       | 1.92 ± 0.04        | 1184.6 ± 10.9                         |
| 22MOI3-SF | 99.3 ± 0.2  | 8.95 ± 0.25         | 94.2 ± 0.1     | 580.9 ± 14.1                      | 1.82 ± 0.05        | 1205.5 ± 27.5                         |
| 22MOI3-SM | 99.3 ± 0.3  | 5.01 ± 0.08         | 93.9 ± 0.6     | 664.6 ± 1.3                       | 1.51 ± 0.02        | 1217.0 ± 27.4                         |
| 22MOI3-SC | 99.7 ± 0.1  | 10.64 ± 0.35        | 96.1 ± 0.1     | 557.3 ± 9.0                       | 1.80 ± 0.01        | 1242.5 ± 9.8                          |
| 24MOI1-SF | 99.5 ± 0.2  | 1.15 ± 0.23         | 90.6 ± 0.0     | 724.6 ± 1.3                       | 1.41 ± 0.03        | 1339.8 ± 17.3                         |
| 24MOI1-SM | 99.5 ± 0.1  | 2.67 ± 0.03         | 94.4 ± 0.1     | 694.6 ± 10.3                      | 1.30 ± 0.01        | 1301.7 ± 24.9                         |
| 24MOI1-SC | 99.7 ± 0.1  | 3.19 ± 0.20         | 95.1 ± 0.3     | 698.2 ± 5.2                       | 1.75 ± 0.01        | 1264.1 ± 18.1                         |
| 24MOI2-SF | 99.6 ± 0.1  | 2.59 ± 0.04         | 94.4 ± 0.4     | 721.9 ± 5.2                       | 1.35 ± 0.02        | 1300.4 ± 8.8                          |
| 24MOI2-SM | 99.5 ± 0.1  | 2.09 ± 0.97         | 93.9 ± 0.7     | 720.6 ± 11.0                      | 1.21 ± 0.08        | 1330.8 ± 27.5                         |
| 24MOI2-SC | 99.8 ± 0.1  | 5.41 ± 0.05         | 98.0 ± 0.0     | 670.0 ± 11.6                      | 1.82 ± 0.02        | 1253.0 ± 14.2                         |
| 24MOI3-SF | 99.7 ± 0.1  | 2.59 ± 0.04         | 92.9 ± 0.1     | 714.6 ± 2.6                       | 1.26 ± 0.02        | 1283.9 ± 15.3                         |
| 24MOI3-SM | 99.6 ± 0.2  | 3.12 ± 0.06         | 95.0 ± 0.2     | 720.9 ± 3.8                       | 1.37 ± 0.03        | 1290.7 ± 15.8                         |
| 24MOI3-SC | 99.8 ± 0.1  | 6.61 ± 0.08         | 98.0 ± 0.1     | 660.9 ± 3.8                       | 1.49 ± 0.01        | 1259.4 ± 8.1                          |

**Table S7.** Pearson correlation coefficients among the characteristics of the pellet samples of debarked pine trunk. The significant correlation values (<0.05) are depicted in bold.

| Correlation Coefficients |                  | Yield        | Moisture     | Durability   | Bulk density | Pellet length | Particle density |
|--------------------------|------------------|--------------|--------------|--------------|--------------|---------------|------------------|
| Pearson Correlation      | Yield            | 1.000        | 0.314        | 0.786        | -0.145       | 0.361         | -0.085           |
|                          | Moisture         | 0.314        | 1.000        | 0.519        | -0.925       | 0.745         | -0.615           |
|                          | Durability       | 0.786        | 0.519        | 1.000        | -0.300       | 0.554         | -0.337           |
|                          | Bulk density     | -0.145       | -0.925       | -0.300       | 1.000        | -0.642        | 0.638            |
|                          | Pellet length    | 0.361        | 0.745        | 0.554        | -0.642       | 1.000         | -0.460           |
|                          | Particle density | -0.085       | -0.615       | -0.337       | 0.638        | -0.460        | 1.000            |
| Signification            | Yield            | -            | <b>0.003</b> | <b>0.000</b> | 0.179        | <b>0.001</b>  | 0.430            |
|                          | Moisture         | <b>0.003</b> | -            | <b>0.000</b> | <b>0.000</b> | <b>0.000</b>  | <b>0.000</b>     |
|                          | Durability       | <b>0.000</b> | <b>0.000</b> | -            | <b>0.004</b> | <b>0.000</b>  | <b>0.001</b>     |
|                          | Bulk density     | 0.179        | <b>0.000</b> | <b>0.004</b> | -            | <b>0.000</b>  | <b>0.000</b>     |
|                          | Pellet length    | <b>0.001</b> | <b>0.000</b> | <b>0.000</b> | <b>0.000</b> | -             | <b>0.000</b>     |
|                          | Particle density | 0.430        | <b>0.000</b> | <b>0.001</b> | <b>0.000</b> | <b>0.000</b>  | -                |
